# Supplementary material for: A systematic review of service models and evidence relating to the clinically operated community-based residential mental health rehabilitation for adults with severe and persisting mental illness in Australia
Source: Springer Nature journal article supplement (doi:10.1186/s12888-019-2019-5), 2019-02-04
Supplement: MOESM1 [file 16442058]

## Additional file 1: Search strategy.

### Grey-literature: Initial internet search strategy

| Database | Date     | Purpose                                                                                                                                                                   | Terms                                                                                                                              | Output                                                                                                                                                                                                                                                                                                                                                                                                                                                                                                                                                                                                                                                                                                                                                                                                                                                                                                                                                                                                                                                                                                                                                                                                                                                                                                                                                                                                                                                                                                                                                                                                                                                                                                                                                                                                                                                                                                                                                                                                                                                                                                                                                                                                                                                              |
|----------|----------|---------------------------------------------------------------------------------------------------------------------------------------------------------------------------|------------------------------------------------------------------------------------------------------------------------------------|---------------------------------------------------------------------------------------------------------------------------------------------------------------------------------------------------------------------------------------------------------------------------------------------------------------------------------------------------------------------------------------------------------------------------------------------------------------------------------------------------------------------------------------------------------------------------------------------------------------------------------------------------------------------------------------------------------------------------------------------------------------------------------------------------------------------------------------------------------------------------------------------------------------------------------------------------------------------------------------------------------------------------------------------------------------------------------------------------------------------------------------------------------------------------------------------------------------------------------------------------------------------------------------------------------------------------------------------------------------------------------------------------------------------------------------------------------------------------------------------------------------------------------------------------------------------------------------------------------------------------------------------------------------------------------------------------------------------------------------------------------------------------------------------------------------------------------------------------------------------------------------------------------------------------------------------------------------------------------------------------------------------------------------------------------------------------------------------------------------------------------------------------------------------------------------------------------------------------------------------------------------------|
| Google   | 16-10-15 | Scoping – identification of relevant service types for subsequent search construction<br><br>AND<br><br>Identification of relevant grey-literature sources for inclusion. | rehabilitation AND residential AND community AND psychiatric OR psychosocial OR "mental health" (limited to the country Australia) | Limited to consideration of the first 100 records listed by relevance<br><br>Examples of out of scope records/services: <ul style="list-style-type: none"> <li>Youth Residential Rehabilitation (Victoria) (e.g. <a href="https://www2.health.vic.gov.au/mental-health/mental-health-services/services-by-type/mental-health-community-support-services/youth-residential-rehabilitation-services">https://www2.health.vic.gov.au/mental-health/mental-health-services/services-by-type/mental-health-community-support-services/youth-residential-rehabilitation-services</a>)</li> <li>Peer Recovery Communities (non-clinical) and Prevention and Recovery Care PARC (clinical but step-up/step-down)</li> <li>Non-clinical residential rehabilitation programs, e.g. OTCP and Benambra Residential Service(NSW)</li> <li>Non-community based inpatient services (e.g. SMHRU, Secure Extended Care Units)</li> <li>Residential Rehabilitation &amp; Recovery services Level 5 (Tasmania) which approximate PARC (i.e. step-up/step-down care)</li> </ul> Potentially in scope records/services identified: <ul style="list-style-type: none"> <li>Community Mental Health Rehabilitation Service and Community Rehabilitation Centre (SA)</li> <li>Adult Residential Rehabilitation (Vic)</li> <li>Community Care Units and Residential rehabilitation services (Vic)</li> <li>Residential Recovery Program (Ballarat) – a Community Care Unit type service</li> <li>Brian Hennessy Rehabilitation Centre BHRC / Brian Hennessy House (ACT)</li> <li>Paterson, S (2002) A Review of Anglesey Interim Community Rehabilitation Facility. Preliminary report. Department of Health, Government of Western Australia, Perth.</li> </ul>                                                                                                                                                                                                                                                                                                                                                                                                                                                                                                                             |
|          |          |                                                                                                                                                                           |                                                                                                                                    | <a href="https://www.mindaustralia.org.au/assets/docs/Resources/Mind%20Peer%20Recovery%20f_web.pdf">https://www.mindaustralia.org.au/assets/docs/Resources/Mind%20Peer%20Recovery%20f_web.pdf</a><br><a href="http://www.otcp.com.au/about-us/company-overview/">http://www.otcp.com.au/about-us/company-overview/</a><br><a href="http://www.dhhs.tas.gov.au/_data/assets/pdf_file/0003/38982/RRRS_Model_of_Care_March_2008a.pdf">http://www.dhhs.tas.gov.au/_data/assets/pdf_file/0003/38982/RRRS_Model_of_Care_March_2008a.pdf</a><br><br><a href="http://www.sahealth.sa.gov.au/wps/wcm/connect/34f1318044229d7aae7eeac7d3e3720/Community+Mental+Health+Rehabilitation+Service_Brochure.pdf?MOD=AJPERES&amp;CACHEID=34f1318044229d7aae7eeac7d3e3720">http://www.sahealth.sa.gov.au/wps/wcm/connect/34f1318044229d7aae7eeac7d3e3720/Community+Mental+Health+Rehabilitation+Service_Brochure.pdf?MOD=AJPERES&amp;CACHEID=34f1318044229d7aae7eeac7d3e3720</a><br><a href="https://www2.health.vic.gov.au/getfile/?sc_itemid={2967ACFF-25A8-4369-A388-4087FAAD9B17}&amp;title=Review%20of%20the%20PDRSS%20Day%20Program,%20Adult%20Residential%20Rehabilitation%20and%20Youth%20Residential%20Rehabilitation%20Services">https://www2.health.vic.gov.au/getfile/?sc_itemid={2967ACFF-25A8-4369-A388-4087FAAD9B17}&amp;title=Review%20of%20the%20PDRSS%20Day%20Program,%20Adult%20Residential%20Rehabilitation%20and%20Youth%20Residential%20Rehabilitation%20Services</a><br><a href="http://www.betterhealth.vic.gov.au/bhcv2/bhcarticles.nsf/pages/Mental_illness_services_residential_care">http://www.betterhealth.vic.gov.au/bhcv2/bhcarticles.nsf/pages/Mental_illness_services_residential_care</a><br><a href="https://www.bhs.org.au/node/266">https://www.bhs.org.au/node/266</a><br><a href="http://www.mhf.org.au/services-directory/item/brian-hennessy-rehabilitation-centre">http://www.mhf.org.au/services-directory/item/brian-hennessy-rehabilitation-centre</a><br><a href="http://www.health.wa.gov.au/docreg/Education/Population/Health_Problems/Mental_Illness/A_recovery_vision_for_rehabilitation.pdf">http://www.health.wa.gov.au/docreg/Education/Population/Health_Problems/Mental_Illness/A_recovery_vision_for_rehabilitation.pdf</a> |

### Database search strategy:

| Database     | Final search date | Purpose                                                                 | Search string(s)                                                                                                                                                                                                                                                                                                                                                                    | Unique records identified |
|--------------|-------------------|-------------------------------------------------------------------------|-------------------------------------------------------------------------------------------------------------------------------------------------------------------------------------------------------------------------------------------------------------------------------------------------------------------------------------------------------------------------------------|---------------------------|
| PubMed       | 08-02-18          | Broad capture of relevant records                                       | ("schizophrenia"[MeSH Terms] OR "schizophrenia"[All Fields]) AND ("rehabilitation"[Subheading] OR "rehabilitation"[All Fields] OR "rehabilitation"[MeSH Terms]) AND residential[All Fields] AND ("1995/01/01"[PDAT] : "3000/12/31"[PDAT])                                                                                                                                           | 318                       |
|              |                   | Focussed capture using identified services from initial internet search | "community rehabilitation centre"[All Fields] OR "community mental health rehabilitation service" [All fields] OR "community care unit"[All Fields] OR "Residential recovery program"[All Fields] OR "hennessy house" [All Fields] OR "hennessy rehabilitation centre" [All Fields] OR "Anglesey interim rehabilitation" [All Fields] AND ("1995/01/01"[PDAT] : "3000/12/31"[PDAT]) |                           |
| CINAHL       | 08-02-18          | Broad capture of relevant records                                       | rehabilitation and residential and schizophrenia and community (Published Date: 19950101-20151231)                                                                                                                                                                                                                                                                                  | 65                        |
|              |                   | Focussed capture using identified services from initial internet search | "community rehabilitation centre" OR "community mental health rehabilitation service" OR "community care unit" OR "residential recovery program" OR "hennessy house" OR "hennessy rehabilitation centre" OR "anglesey interim rehabilitation" (Published Date: 19950101-20151231)                                                                                                   |                           |
| PsycINFO     | 08-02-18          | Broad capture of relevant records                                       | Any Field: schizophrenia AND Any Field: residential AND Any Field: rehabilitation AND Year: 1995 To 9999                                                                                                                                                                                                                                                                            | 100                       |
|              |                   | Focussed capture using identified services from initial internet search | Any Field: "community rehabilitation centre" OR "community mental health rehabilitation service" OR "community care unit" OR "residential recovery program" OR "hennessy house" OR "hennessy rehabilitation centre" OR "anglesey interim rehabilitation" Year: 1995 To 9999                                                                                                         |                           |
| EmBASE       | 08-02-18          | Broad capture of relevant records                                       | 'schizophrenia'/exp OR schizophrenia AND residential AND ('rehabilitation'/exp OR rehabilitation) AND [1995-2015]/py                                                                                                                                                                                                                                                                | 163                       |
|              |                   | Focussed capture using identified services from initial internet search | 'community rehabilitation centre' OR 'community mental health rehabilitation service' OR 'community care unit' OR 'residential recovery program' OR 'hennessy house' OR 'hennessy rehabilitation centre' OR 'anglesey interim rehabilitation' AND [1995-2015]/py                                                                                                                    |                           |
| <b>TOTAL</b> |                   |                                                                         |                                                                                                                                                                                                                                                                                                                                                                                     | <b>646</b>                |
