# Supplementary material for: A systematic review of service models and evidence relating to the clinically operated community-based residential mental health rehabilitation for adults with severe and persisting mental illness in Australia
Source: Springer Nature journal article supplement (doi:10.1186/s12888-019-2019-5), 2019-02-04
Supplement: MOESM3 [file 16442058]

**Appendix 2: Detailed description of types & models of community-based & clinically operated residential rehabilitation for people affected by schizophrenia & related disorders in Australia.**

| Service type                            | Focus / objective                                                                                                                                                            | Service model                   | Timeframe        | State   | Physical environment                                                                                                                                                                                                                                                                                                                | Philosophy of Care                                                                                                                                                                                                                                                                                 | Treatment and support                                                                                                                                                                                                                                                                                                                                                                                                                                                                                                  | Source       |
|-----------------------------------------|------------------------------------------------------------------------------------------------------------------------------------------------------------------------------|---------------------------------|------------------|---------|-------------------------------------------------------------------------------------------------------------------------------------------------------------------------------------------------------------------------------------------------------------------------------------------------------------------------------------|----------------------------------------------------------------------------------------------------------------------------------------------------------------------------------------------------------------------------------------------------------------------------------------------------|------------------------------------------------------------------------------------------------------------------------------------------------------------------------------------------------------------------------------------------------------------------------------------------------------------------------------------------------------------------------------------------------------------------------------------------------------------------------------------------------------------------------|--------------|
| Community based residential care        | <ul style="list-style-type: none"> <li>Deinstitutionalisation of people with SPMI</li> <li>Permanent residence</li> <li>Accommodation, rehabilitation and support</li> </ul> | Community Residences            | 1994-early 2000s | NSW     | <ul style="list-style-type: none"> <li>Group homes (3x 10-bed), with single or twin share bedrooms and shared kitchen and dining facilities, OR apartment block (x1) with four self-contained units.</li> <li>Provision of indoor and outdoor recreation areas.</li> <li>Walking distance to shops and public transport.</li> </ul> | <ul style="list-style-type: none"> <li>Intensive case management through an adapted model of Assertive Community Treatment</li> <li>Normalisation through treatment in a residential setting</li> <li>Rehabilitation focus</li> </ul>                                                              | <ul style="list-style-type: none"> <li>24-hour Multi-Disciplinary Team (MDT) support initially, with a step-wise reduction over time</li> <li>Individualised programs: living skills, planning for more independent living (e.g. budgeting, medication self-administration, vocational engagement)</li> <li>Prompting, modelling, task analysis, practical assistance and education</li> <li>Case managers facilitate access to external resources in the community.</li> </ul>                                        | [1-3]        |
|                                         |                                                                                                                                                                              | Community Care Unit             | 1996-early 2000s | VIC     | <ul style="list-style-type: none"> <li>Purpose build cluster-style housing with up to 20-beds, providing a 'home-like environment' built close to shops and public transport.</li> <li>Provision of outdoor recreation and quiet spaces, as well as communal rooms for group activities, described</li> </ul>                       | <ul style="list-style-type: none"> <li>The application of case management to a residential psychosocial rehabilitation program integrating clinical care and disability support</li> <li>Emphasis on accessing and utilising community-based services and resources</li> </ul>                     | <ul style="list-style-type: none"> <li>24-hour nursing supervision available</li> <li>Primary focus of 'living skills therapy' and medication adherence/monitoring</li> <li>Absence of group-based rehabilitation activities emphasised</li> <li>Behaviour therapy as the only documented individual therapy</li> </ul>                                                                                                                                                                                                | [4-10]       |
| Transitional residential rehabilitation | <ul style="list-style-type: none"> <li>Rehabilitation</li> <li>Focus on SPMI</li> <li>Transitional residential support</li> </ul>                                            |                                 | Early 2000s+     | VIC QLD | <ul style="list-style-type: none"> <li>Early iterations provided individual bedrooms and shared bathroom, kitchen and living areas to small groups of residents.</li> <li>Later iterations described mixed residential configurations including self-contained single-occupancy, dual occupancy and shared units</li> </ul>         | <ul style="list-style-type: none"> <li>Transitional support over 6-24 months, but with acknowledgement that some consumers may require further extended care</li> <li>Recovery-oriented</li> <li>Strengths-based</li> <li>Rehabilitation focussed</li> <li>Individualised care planning</li> </ul> | <ul style="list-style-type: none"> <li>24-hour clinical staff support availability</li> <li>Individual therapeutic focus including: CBT; living skills development; structured leisure and physical activities; and evidence-based therapeutic groups.</li> <li>Provision of psychoeducation and support to carers, and promoting continued links between consumers and their carers</li> <li>Not authorised mental health services</li> </ul>                                                                         | [4, 11-16]   |
|                                         |                                                                                                                                                                              |                                 | 2014+            | QLD     |                                                                                                                                                                                                                                                                                                                                     |                                                                                                                                                                                                                                                                                                    | <ul style="list-style-type: none"> <li>As above but with the additional availability of an integrated staffing configuration where Peer Support Workers occupy the majority of roles.</li> </ul>                                                                                                                                                                                                                                                                                                                       | [11, 12, 17] |
|                                         |                                                                                                                                                                              | Hawthorne House                 | 2006-2009        | WA      | <ul style="list-style-type: none"> <li>Stand-alone 16-bed converted community hospital</li> </ul>                                                                                                                                                                                                                                   | <ul style="list-style-type: none"> <li>Psychiatric rehabilitation</li> <li>Commitment to recovery</li> <li>Biopsychosocial approach</li> </ul>                                                                                                                                                     | <ul style="list-style-type: none"> <li>Maximum of 16 weeks of active structured psychiatric rehabilitation focussed on transitioning 'rehabilitation ready' hospitalised inpatients</li> <li>MDT (Occupational Therapy, Nursing, Social Work, Art therapy, Medical)</li> </ul>                                                                                                                                                                                                                                         | [18]         |
|                                         |                                                                                                                                                                              | Community Rehabilitation Centre | 2007+            | SA      | <ul style="list-style-type: none"> <li>Three sites including 2 purpose-built (outer-urban location) and one re-purposed building (inner-urban location).</li> <li>Shared and individual living units are available, each with individual bedrooms.</li> </ul>                                                                       | <ul style="list-style-type: none"> <li>Recovery-oriented rehabilitation, including focus on prevention, early intervention, and voluntary participation</li> <li>Emphasis on viewing the person in the context of their family and significant others.</li> </ul>                                  | <ul style="list-style-type: none"> <li>24-hour staff support, with staffing configuration including clinical and non-clinical (including peer) specialists</li> <li>Working in partnership with the community mental health team.</li> <li>Active and goal focused rehabilitation program including therapeutic interventions, skills development, building/rebuilding personal networks, and fostering community links</li> <li>Average residence &lt;6 months</li> <li>Not Approved Treatment Centres</li> </ul>     | [19-21]      |
|                                         |                                                                                                                                                                              | Community Recovery Program      | 2014+            | VIC     | <ul style="list-style-type: none"> <li>22-bed purpose-built unit, standalone co-located with a hospital service</li> </ul>                                                                                                                                                                                                          | <ul style="list-style-type: none"> <li>Recovery-focused rehabilitation</li> <li>working within a philosophy of 'home' and 'community', recovery and social inclusion, and consumer participation.</li> <li>Emphasis also on consumer-centred care, and family/carer involvement.</li> </ul>        | <ul style="list-style-type: none"> <li>Partnership model with clinical care provided by nursing staff employed by the health service and 'community health practitioners' with expertise in recovery-oriented psychosocial rehabilitation employed by a non-government organisation. Peer and family/care workers are included in staffing profile.</li> <li>Focus on living skills development, psychoeducation, recreation and fostering links with the community.</li> <li>Group programs are available.</li> </ul> | [22-24]      |

## REFERENCES:

1. Hobbs C, Newton L, Tennant C, Rosen A, Tribe K: **Deinstitutionalization for long-term mental illness: a 6-year evaluation.** *The Australian and New Zealand journal of psychiatry* 2002, **36**(1):60-66.
2. Newton L, Rosen A, Tennant C, Hobbs C, Lapsley HM, Tribe K: **Deinstitutionalisation for long-term mental illness: an ethnographic study.** *The Australian and New Zealand journal of psychiatry* 2000, **34**(3):484-490.
3. Hobbs C, Tennant C, Rosen A, Newton L, Lapsley HM, Tribe K, Brown JE: **Deinstitutionalisation for long-term mental illness: a 2-year clinical evaluation.** *The Australian and New Zealand journal of psychiatry* 2000, **34**(3):476-483.
4. Chopra P, Herrman HE: **The long-term outcomes and unmet needs of a cohort of former long-stay patients in Melbourne, Australia.** *Community mental health journal* 2011, **47**(5):531-541.
5. Hamden A, Newton R, McCauley-Elsom K, Cross W: **Is deinstitutionalization working in our community?** *International journal of mental health nursing* 2011, **20**(4):274-283.
6. Farhall J, Trauer T, Newton R, Cheung P: **Minimizing adverse effects on patients of involuntary relocation from long-stay wards to community residences.** *Psychiatric services (Washington, DC)* 2003, **54**(7):1022-1027.
7. Trauer T, Farhall J, Newton R, Cheung P: **From long-stay psychiatric hospital to Community Care Unit: evaluation at 1 year.** *Social psychiatry and psychiatric epidemiology* 2001, **36**(8):416-419.
8. Trauer T: **Symptom severity and personal functioning among patients with schizophrenia discharged from long-term hospital care into the community.** *Community mental health journal* 2001, **37**(2):145-155.
9. Farhall J, Trauer T, Newton R, Cheung P: **Community Care Units Evaluation Project: One year report. Melbourne: Victorian Government.** In.; 1999.
10. Gerrand V, Bloch S, Smith J, Goding M, Castle D: **Reforming mental health care in Victoria: a decade later.** *Australasian psychiatry : bulletin of Royal Australian and New Zealand College of Psychiatrists* 2007, **15**(3):181-184.
11. Parker S, Meurk C, Newman E, Fletcher C, Swinson I, Dark F: **Understanding consumers' initial expectations of community-based residential mental health rehabilitation in the context of past experiences of care: A mixed-methods pragmatic grounded theory analysis.** *International journal of mental health nursing* 2018.
12. Parker S, Dark F, Newman E, Hanley D, McKinlay W, Meurk C: **Consumers' understanding and expectations of a community-based recovery-oriented mental health rehabilitation unit: a pragmatic grounded theory analysis.** *Epidemiology and psychiatric sciences* 2017:1-10.
13. Parker S, Dark F, Newman E, Korman N, Rasmussen Z, Meurk C: **Reality of working in a community-based, recovery-oriented mental health rehabilitation unit: A pragmatic grounded theory analysis.** *International journal of mental health nursing* 2017, **26**(4):355-365.
14. Meehan T, Stedman T, Parker S, Curtis B, Jones D: **Comparing clinical and demographic characteristics of people with mental illness in hospital- and community-based residential rehabilitation units in Queensland.** *Aust Health Rev* 2017, **41**(2):139-143.
15. McKenna B, Oakes J, Fourniotis N, Toomey N, Furness T: **Recovery-Oriented Mental Health Practice in a Community Care Unit: An Exploratory Study.** *Journal of forensic nursing* 2016, **12**(4):167-175.
16. Department of Human Services: **Community Care (CCU) and secure extended care units (SECU). Program management circular.** In. Edited by Division MHBMHaACS. Victoria: Victorian Government; 2007.
17. Parker S, Dark F, Vilic G, Doyle C, Lendich B, O'Sullivan R, McCann K: **Integrated staffing model for mental health rehabilitation (in press).** *Mental Health and Social Inclusion* 2016, **20**(2).
18. Smith G, Williams T, Lefay L: **Evaluating the Hawthorn House Rehabilitation Service.** In. Perth: Department of Health; 2009.
19. Barnett K, Guiver N, Cheok F: **Evaluation of the Three Community Rehabilitation Centres: FINAL REPORT.** In. Edited by Health S. South Australia: SA Health; 2011.
20. SA HEALTH MHU: **Community Mental Health Services Service Model: Community Recovery Centres.** In. South Australia; 2010.
21. Department of Health GoSA: **Mental Health Service: Community Rehabilitation Centres (CRCs).** In. Edited by Department of Health GoSA. South Australia: Department of Health, Government of South Australia; 2010.
22. Saraf S, Newton R: **Care or recovery? Redefining residential rehabilitation.** *Australasian psychiatry : bulletin of Royal Australian and New Zealand College of Psychiatrists* 2017, **25**(2):161-163.
23. Wooldridge M: **Media release: New mental health recovery program opens at Austin Health.** In. Edited by Victorian Government. Victoria; 2014.
24. **Community Recovery Program** [<http://www.austin.org.au/mentalhealth/NEAMHS/CRP/>]
