# Supplementary material for: A systematic review of service models and evidence relating to the clinically operated community-based residential mental health rehabilitation for adults with severe and persisting mental illness in Australia
Source: Springer Nature journal article supplement (doi:10.1186/s12888-019-2019-5), 2019-02-04
Supplement: MOESM4 [file 16442058]

### Appendix 3: Consumer characteristics

| Source(s)                                                                                       |              | Service classification |                      | Cohort details                      |             |       |            | Demographics |          |      |                 |                   | Restrictive Practice |                     | Dx                    | Co-morbidity       |                                   |                            |                        |                      | Impairment            |                  |                   |                  |                               |   |
|-------------------------------------------------------------------------------------------------|--------------|------------------------|----------------------|-------------------------------------|-------------|-------|------------|--------------|----------|------|-----------------|-------------------|----------------------|---------------------|-----------------------|--------------------|-----------------------------------|----------------------------|------------------------|----------------------|-----------------------|------------------|-------------------|------------------|-------------------------------|---|
| Study                                                                                           | Reference(s) | Service Type           | Service name         | Cohort type                         | Sample size | State | Year START | Year END     | Mean Age | Male | Australian born | ATSI <sup>j</sup> | Unemployment         | Community admission | Involuntary treatment | Guardianship order | Primary Dx - F20-F29 <sup>k</sup> | Substance use <sup>l</sup> | Developmental Disorder | Personality disorder | Acquired brain injury | Physical illness | Mean Total LSP-16 | Mean total HoNOS | Mean CPZ eq <sup>m</sup> (mg) |   |
| <b>Included records presenting unique descriptive information about consumers<sup>a,b</sup></b> |              |                        |                      |                                     |             |       |            |              |          |      |                 |                   |                      |                     |                       |                    |                                   |                            |                        |                      |                       |                  |                   |                  |                               |   |
| QMHBUC (2017) <sup>d</sup>                                                                      | [1]          | TRR +/-                | CCU                  | Cross sectional (current residents) | 241         | QLD   | 2017       | -            | 36       | 71%  | 86%             | 12%               | 70%                  | 46%                 | 58%                   | 37%                | 85%                               | 30%                        | -                      | -                    | -                     | 53%              | -                 | -                | 573.2                         |   |
| QMHBUC (2015) <sup>d</sup>                                                                      | [2]          | TRR +/-                | CCU                  | Cross sectional (current residents) | 155         | QLD   | 2015       | -            | 37       | 76%  | 81%             | 8%                | -                    | 46%                 | 65%                   | 38%                | 90%                               | 21%                        | 5%                     | 6%                   | -                     | 50%              | -                 | -                | 610.2                         |   |
| Parker et al. (2017, 2018) <sup>d,e</sup>                                                       | [3]          | TRR +/-                | CCU                  | Service commencement                | 24          | QLD   | 2014       | 2016         | 30 (7.8) | 75%  | -               | -                 | 100%                 | 67%                 | 50%                   | -                  | 87%                               | 54%                        | 8%                     | 8%                   | 4%                    | -                | 13 (7.5)          | 12 (6.4)         | 646 (411)                     |   |
| Meehan (2017) et al                                                                             | [4]          | TRR                    | CCU                  | Cross sectional (current residents) | 115         | QLD   | 2013       | -            | 39       | -    | -               | -                 | -                    | -                   | 38%                   | 36%                | 84%                               | -                          | -                      | -                    | -                     | 44.30%           | 17.5 (8.7)        | 12.7 (6.4)       | 559 (314)                     |   |
| QMHBUC (2011)                                                                                   | [5]          | TRR                    | CCU                  | Cross sectional (current residents) | 85          | QLD   | 2011       | -            | 38       | 69%  | 82%             | 8%                | -                    | -                   | 72%                   | 33%                | 93%                               | 27%                        | -                      | -                    | -                     | 60%              | -                 | -                | 684.7                         |   |
| QMHBUC (2009)                                                                                   | [6]          | TRR                    | CCU                  | Cross sectional (current residents) | 85          | QLD   | 2009       | -            | 35       | 80%  | 88%             | 12%               | -                    | -                   | 67%                   | 72%                | 94%                               | 31%                        | -                      | -                    | -                     | 29%              | -                 | -                | 727.9                         |   |
| Barnett et al (2011) <sup>f</sup>                                                               | [7]          | TRR                    | CRU                  | Case series                         | 238         | SA    | 2007       | 2010         | 32       | 75%  | -               | 5%                | -                    | 81% <sup>g</sup>    | 7%                    | -                  | 80%                               | 4%                         | 2%                     | 4%                   | -                     | 3%               | -                 | 16.5             | -                             |   |
| QMHBUC (2007)                                                                                   | [8]          | TRR                    | CCU                  | Cross sectional (current residents) | 92          | QLD   | 2007       | -            | 36       | 75%  | 89%             | 16%               | -                    | -                   | 67%                   | 46%                | 93%                               | 22%                        | -                      | -                    | -                     | 44%              | -                 | -                | -                             |   |
| Smith, Williams & Lefay (2009)                                                                  | [9]          | TRR                    | Hawthorne House      | Case series                         | 39          | WA    | 2006       | 2008         | 33       | 49%  | -               | -                 | -                    | 0% <sup>i</sup>     | -                     | -                  | 71%                               | -                          | -                      | -                    | -                     | -                | -                 | -                | -                             |   |
| QMHBUC (2005)                                                                                   | [10]         | TRR                    | CCU                  | Cross sectional (current residents) | 76          | QLD   | 2005       | -            | 35       | 67%  | -               | 7%                | -                    | -                   | 70%                   | -                  | 88%                               | -                          | -                      | -                    | -                     | 22%              | -                 | -                | -                             |   |
| Trauer (2001) <sup>h</sup>                                                                      | [11]         | C-BRC                  | CCU                  | Case series                         | 20          | VIC   | 1997       | 1998         | 43 (9.8) | 60%  | -               | -                 | -                    | 0%                  | 95%                   | -                  | 100%                              | 15%                        | 15%                    | -                    | -                     | 20%              | -                 | -                | 936                           |   |
| Trauer (2001) et al <sup>h</sup>                                                                | [12]         | C-BRC                  | CCU                  | Service commencement                | 125         | VIC   | 1996       | -            | 44       | 62%  | -               | -                 | -                    | 0%                  | 86%                   | -                  | 97%                               | -                          | -                      | -                    | -                     | -                | -                 | -                | 775                           |   |
| Hamden (2011) et al                                                                             | [13]         | C-BRC                  | CCU                  | Current and past service users      | 121         | VIC   | 1996       | 2007         | 38       | 67%  | -               | -                 | -                    | -                   | -                     | -                  | -                                 | -                          | -                      | -                    | -                     | -                | -                 | -                | -                             |   |
| Hobbs et al (2002) <sup>~</sup>                                                                 | [14]         | C-BRC                  | Community Residences | Service commencement                | 47          | NSW   | 1994       | -            | 41       | 53%  | 83%             | -                 | -                    | 0%                  | -                     | -                  | 98%                               | -                          | 2%                     | -                    | -                     | -                | -                 | -                | 1127                          |   |
| Farhall et al. (2003) <sup>h</sup>                                                              | [15]         | C-BRC                  | CCU                  | Service commencement                | 85          | VIC   | 1994       | 1999         | 42 (9.8) | 64%  | -               | -                 | -                    | 0%                  | 84%                   | -                  | 92%                               | -                          | -                      | -                    | -                     | -                | -                 | -                | -                             |   |
| <b>Excluded records: Follow-up details only</b>                                                 |              |                        |                      |                                     |             |       |            |              |          |      |                 |                   |                      |                     |                       |                    |                                   |                            |                        |                      |                       |                  |                   |                  |                               |   |
| Chopra (2011) et al.                                                                            | [16]         | TRR                    | CCU                  | Follow-up (8 years post)            | 18          | VIC   | 2003       | -            | -        | -    | -               | -                 | 100%                 | 0%                  | -                     | -                  | 100%                              | 17%                        | 28%                    | 6%                   | -                     | 83%              | 22.1              | 16.2             | -                             |   |
| <b>Excluded records: Nil descriptive data available</b>                                         |              |                        |                      |                                     |             |       |            |              |          |      |                 |                   |                      |                     |                       |                    |                                   |                            |                        |                      |                       |                  |                   |                  |                               |   |
| Munro (2007) et al                                                                              | [17]         | TRR                    | CCU                  | Single case study                   | 1           | -     | 2007       | -            | -        | -    | -               | -                 | -                    | -                   | -                     | -                  | -                                 | -                          | -                      | -                    | -                     | -                | -                 | -                | -                             | - |
| McKenna (2016) et al                                                                            | [18]         | TRR                    | CCU                  | Qualitative interviews              | 7           | -     | 2014       | -            | -        | -    | -               | -                 | -                    | -                   | -                     | -                  | -                                 | -                          | -                      | -                    | -                     | -                | -                 | -                | -                             |   |

#### Notes

- <sup>a</sup> For longitudinal cohort data, the earliest time-point of data collection is added when available to each cell
- <sup>b</sup> Where relevant and available standard deviations are listed in brackets ( ) following the mean score, where decimal points for the mean values are available these are presented at the level of one decimal point.
- <sup>c</sup> Queensland Mental Health Benchmarking Unit (QMHBUC) associated publications (formerly Service and Evaluation Research Unit)
- <sup>d</sup> At least partial overlap is anticipated across these studies due to the combination of cross-sectional data and service commencement cohorts
- <sup>e</sup> The same cohort is considered across both studies, only the reference for the earliest published study is provided
- <sup>f</sup> The actual sample size for each variable is not consistent, n=238 represented maximal cohort size
- <sup>g</sup> Referral data based on the total referrals during the study period (n=266) not the accepted referrals (n=238)
- <sup>h</sup> Anticipated at least partial overlap of cohort data, as all records related to the initially deinstitutionalised Victorian consumer group
- <sup>i</sup> Inferred from the documented requirement for service entry for referrals to be made from current inpatient mental health consumers
- <sup>j</sup> Identification as being of Aboriginal and/or Torres Strait Islander descent
- <sup>k</sup> Schizophrenia spectrum disorders reflecting diagnoses (or equivalent diagnoses) of the International Classification of Diseases codes F20-29.x
- <sup>l</sup> Any co-morbid substance use disorder excluding tobacco-related disorders.
- <sup>m</sup> Mean Chlorpromazine Dose equivalence (as documented in the associated record).

## REFERENCES

1. Queensland Mental Health Benchmarking Unit (QMHBU): **Community Care Units (CCU) Benchmarking Report 2017**. In.; 2017.
2. Queensland Mental Health Benchmarking Unit: **Community Care Units: Benchmarking report 2015 - Queensland Mental Health Benchmarking Unit**. In. Wacol, Qld: Mental Health, Alcohol and Other Drugs Branch, Department of Health (Queensland); 2015.
3. Parker S, Dark F, Newman E, Hanley D, McKinlay W, Meurk C: **Consumers' understanding and expectations of a community-based recovery-oriented mental health rehabilitation unit: a pragmatic grounded theory analysis**. *Epidemiology and psychiatric sciences* 2017;1-10.
4. Meehan T, Stedman T, Parker S, Curtis B, Jones D: **Comparing clinical and demographic characteristics of people with mental illness in hospital- and community-based residential rehabilitation units in Queensland**. *Aust Health Rev* 2017, **41**(2):139-143.
5. Queensland Mental Health Benchmarking Unit: **Multi-site benchmarking of Community Care Units and Extended Treatment & Rehabilitation Mental Health Services - Comparative benchmarking report 2011 - Queensland Mental Health Benchmarking Unit**. In. Wacol, Queensland: Queensland Mental Health Benchmarking Unit,; 2011.
6. Jones D, Neuendorf K, Denkel N: **Multi-site benchmarking of Extended Treatment & Rehabilitation and Dual Diagnosis Inpatient Mental Health Services**. In. Wacol, Queensland: Queensland Mental Health Benchmarking Unit; 2009.
7. Barnett K, Guiver N, Cheok F: **Evaluation of the Three Community Rehabilitation Centres: FINAL REPORT**. In. Edited by Health S. South Australia: SA Health; 2011.
8. Davidson F, Jones D, Neuendorf K: **Multi-site benchmarking of Extended Treatment & Rehabilitation and Dual Diagnosis Inpatient Mental Health Services - Benchmarking report (2007)**. In. Wacol, Queensland: Queensland Mental Health Benchmarking Unit; 2007.
9. Smith G, Williams T, Lefay L: **Evaluating the Hawthorn House Rehabilitation Service**. In. Perth: Department of Health; 2009.
10. Meehan T, Neuendorf K: **Multi-site benchmarking of Extended Treatment & Rehabilitation and Dual Diagnosis Services - Benchmarking Report (2005)**. In. Wacol, Queensland: Service Evaluation and Research Unit, The Park Centre for Mental Health, Brisbane; 2005.
11. Trauer T: **Symptom severity and personal functioning among patients with schizophrenia discharged from long-term hospital care into the community**. *Community mental health journal* 2001, **37**(2):145-155.
12. Trauer T, Farhall J, Newton R, Cheung P: **From long-stay psychiatric hospital to Community Care Unit: evaluation at 1 year**. *Social psychiatry and psychiatric epidemiology* 2001, **36**(8):416-419.
13. Hamden A, Newton R, McCauley-Elsom K, Cross W: **Is deinstitutionalization working in our community?** *International journal of mental health nursing* 2011, **20**(4):274-283.
14. Hobbs C, Newton L, Tennant C, Rosen A, Tribe K: **Deinstitutionalization for long-term mental illness: a 6-year evaluation**. *The Australian and New Zealand journal of psychiatry* 2002, **36**(1):60-66.
15. Farhall J, Trauer T, Newton R, Cheung P: **Minimizing adverse effects on patients of involuntary relocation from long-stay wards to community residences**. *Psychiatric services (Washington, DC)* 2003, **54**(7):1022-1027.
16. Chopra P, Herrman HE: **The long-term outcomes and unmet needs of a cohort of former long-stay patients in Melbourne, Australia**. *Community mental health journal* 2011, **47**(5):531-541.
17. Munro J, Palmada M, Russell A, Taylor P, Heir B, McKay J, Lloyd C: **Queensland extended care services for people with severe mental illness and the role of occupational therapy**. *Australian occupational therapy journal* 2007, **54**:257-265.
18. McKenna B, Oakes J, Fourniotis N, Toomey N, Furness T: **Recovery-Oriented Mental Health Practice in a Community Care Unit: An Exploratory Study**. *Journal of forensic nursing* 2016, **12**(4):167-175.
